# Supplementary material for: Efficacy and safety of decitabine in treatment of elderly patients with acute myeloid leukemia: A systematic review and meta-analysis
Source: PubMed Central journal article supplement (PMC5522197; doi:10.18632/oncotarget.17241), 2017-04-19
Supplement: oncotarget-08-41498-s001.pdf [file oncotarget-08-41498-s001.pdf]

## Efficacy and safety of decitabine in treatment of elderly patients with acute myeloid leukemia: A systematic review and meta-analysis

### Supplementary Materials

**Supplementary Table 1: Baseline characteristics of patients in the included studies**

| First Author           | No. patients | Median age (years) | Gender (male %) | AML type (%)   |           | BM blast (%) |      | Cytogenetics-risk (%) |              |      |
|------------------------|--------------|--------------------|-----------------|----------------|-----------|--------------|------|-----------------------|--------------|------|
|                        |              |                    |                 | <i>De novo</i> | secondary | < 30         | ≥ 30 | favorable             | intermediate | poor |
| Jacob et al. [10]      | 15           | 65                 | 80              | 87             | 13        | 13           | 60   | 33                    | 47           | 20   |
| Yan et al. [11]        | 16           | 75                 | 50              | NR             | NR        | 31           | 69   | NR                    | NR           | NR   |
| Ritchie et al. [12]    | 52           | 75                 | 44              | NR             | NR        | NR           | NR   | NR                    | 53           | 45   |
| Cashen et al. [13]     | 55           | 74                 | 51              | 23             | 71        | 33           | 67   | NR                    | 65           | 35   |
| Blum et al. [14]       | 53           | 74                 | 64              | NR             | NR        | NR           | NR   | 40                    | NR           | 30   |
| Tawfik et al. [15]     | 34           | 75                 | 50              | 53             | 41        | 56           | 35   | 3                     | 32           | 38   |
| Kantarjian et al. [16] | 242          | 73                 | 57              | 64             | 36        | 27           | 71   | NR                    | 63           | 36   |
| Lübbert et al. [17]    | 227          | 72                 | 61              | 49             | 51        | 3            | 95   | 1                     | 45           | 32   |
| Park et al. [18]       | 24           | 73                 | 50              | 92             | 8         | NR           | NR   | 13                    | 67           | 13   |

BM blast: Bone Marrow blast; NR: Not Reported;

**Supplementary Table 2: Risk of bias assessment results**

| Study                  | Random sequence generation | Allocation concealment | Blinding of participants and personnel | Complete outcome data | No selective reporting | Other bias |
|------------------------|----------------------------|------------------------|----------------------------------------|-----------------------|------------------------|------------|
| Jacob et al. [10]      | –                          | –                      | –                                      | –                     | +                      | –          |
| Yan et al. [11]        | –                          | –                      | –                                      | –                     | +                      | –          |
| Ritchie et al. [12]    | –                          | –                      | +                                      | +                     | +                      | –          |
| Cashen et al. [13]     | +                          | +                      | +                                      | +                     | +                      | –          |
| Blum et al. [14]       | –                          | –                      | –                                      | +                     | +                      | –          |
| Tawfik et al. [15]     | –                          | +                      | +                                      | +                     | +                      | –          |
| Kantarjian et al. [16] | +                          | +                      | +                                      | +                     | +                      | –          |
| Lübbert et al. [17]    | +                          | +                      | +                                      | –                     | +                      | –          |
| Park et al. [18]       | –                          | –                      | –                                      | –                     | +                      | –          |

Based on the risk of bias assessment criteria, each article was divided into three different categories:

A: the articles that meet all the criteria are classified into class A;

B: if more than one criterion was not reached or was unclear, we ranked it as class B;

C: for article does not reach any of the criteria, we divided it into class C.

Risk of bias assessment of the 9 studies showed that all the included studies were classified as B.
